# The American Journal of Psychiatry

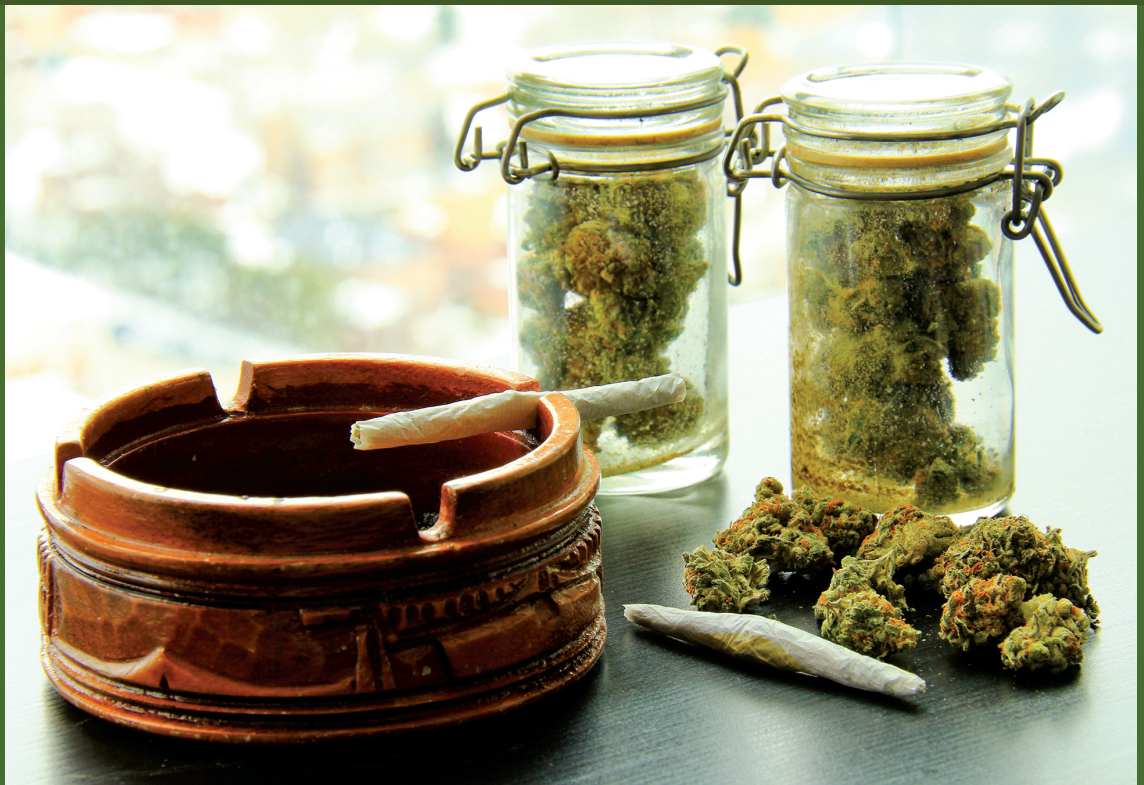

Prevalence and Correlates of DSM-5 Cannabis Use Disorder, 2012–2013:  
Findings From NESARC-III

Adjunctive Nutraceuticals for Depression: A Systematic Review  
and Meta-Analyses

Depressive and Anxiety Disorders Showing Robust, but Non-Dynamic,  
6-Year Longitudinal Association With Short Leukocyte Telomere Length

All-Cause Mortality in Women With Severe Postpartum Psychiatric Disorders
