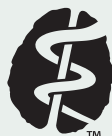

# The American Journal of Psychiatry

Official Journal of the American Psychiatric Association

## Officers 2015–2016

### President

Renée L. Binder, M.D.

### President-Elect

Maria A. Oquendo, M.D.

### Treasurer

Frank W. Brown, M.D.

### Secretary

Altha J. Stewart, M.D.

### Assembly

#### Speaker

Glenn A. Martin, M.D.

#### Speaker-Elect

Daniel J. Anzia, M.D.

#### Recorder

Theresa Miskimen, M.D.

### Office of the CEO and Medical Director

#### CEO and Medical Director

Saul Levin, M.D., M.P.A.

### Board of Trustees

Jeffrey Akaka, M.D.

Lama Bazzi, M.D.

R. Scott Benson, M.D.

Ronald M. Burd, M.D.

Stella Cai, M.D.

Brian Crowley, M.D.

Anita S. Everett, M.D.

Jeffrey L. Geller, M.D., M.P.H.

Dilip V. Jeste, M.D.

Jeffrey A. Lieberman, M.D.

Vivian B. Pender, M.D.

Gail E. Robinson, M.D.

Ravi N. Shah, M.D.

Paul Summergrad, M.D.

Melinda Young, M.D.

*APA Officers and Chairpersons for 2016–2017 took office at the conclusion of the APA Annual Meeting, after this issue went to press. The July issue of The American Journal of Psychiatry will feature these officeholders.*

## Editorial Board

### Editor

Robert Freedman, M.D.

### Deputy Editors

David A. Lewis, M.D.

Robert Michels, M.D.

Daniel S. Pine, M.D.

A. John Rush, M.D.

Susan K. Schultz, M.D.

Carol A. Tamminga, M.D.

### Associate Editors

Alan Brown, M.D., M.P.H.

Tyrone Cannon, Ph.D.

Benjamin G. Druss, M.D., M.P.H.

Felton Earls, M.D.

Graham J. Emslie, M.D.

Daniel C. Javitt, M.D.

Bankole Johnson, M.D.

Joan L. Luby, M.D.

Constantine G. Lyketsos, M.D., M.H.S.

Helen S. Mayberg, M.D., F.R.C.P.C.

Terrie E. Moffitt, Ph.D.

Roy Perlis, M.D.

Anita Thapar, M.B.B.Ch., F.R.C.Psych.,

Ph.D., F.Med.Sci.

Mauricio Tohen, M.D., Dr.PH., M.B.A.

Eduard Vieta, M.D., Ph.D.

Katherine L. Wisner, M.D., M.S.

Xin Yu, M.D.

### Editor Emerita

Nancy C. Andreasen, M.D., Ph.D.

### Former Editors

Amariah Brigham, M.D., 1844–1849

T. Romeyn Beck, M.D., 1849–1854

John P. Gray, M.D., 1854–1886

G. Alder Blumer, M.D., 1886–1894

Richard Dewey, M.D., 1894–1897

Henry M. Hurd, M.D., 1897–1904

Edward N. Brush, M.D., 1904–1931

Clarence B. Farrar, M.D., 1931–1965

Francis J. Braceland, M.D., 1965–1978

John C. Nemiah, M.D., 1978–1993

### Editorial Staff

#### Executive Editor

Michael D. Roy

#### Senior Editors

John J. Guardiano, Ph.D.

Jane Weaver

#### Production Manager

Susan Westrate

#### Assistant Editor

Angela Moore

#### Online Content Manager

Michael Pogachar

#### Editorial Support Services Manager

Heidi Koch

#### Editorial Assistant

Linda LaCour

#### Editorial Assistant/ Permissions Coordinator

Elizabeth Stern

#### Assistants to the Editors

Lois Lilienthal

Laura English

Rachel Hogg

Russell A. Scholl

#### Publisher

Rebecca D. Rinehart

# The Residents' JOURNAL

## The American Journal of Psychiatry Residents' Journal

May 2016

Volume 11

Issue 5

### Inside

- 2 Moral Distress and the Importance of Psychiatric Ethics**  
Jennifer Huang Harris, M.D.  
*Discussion of ethics in the clinical setting and its effects on moral distress.*
- 3 The Right of Psychiatric Patients to Leave Against Medical Advice**  
Rami Abukamil, M.D.  
*Balancing patients' rights against the psychiatrist's responsibility in evaluating the need for treatment when faced with a patient who wishes to leave against medical advice.*
- 4 Ethical Considerations Regarding End-of-Life Planning and Palliative Care Needs in Patients With Chronic Psychiatric Disorders**  
Rebecca L. Bauer, M.D.  
*Examining the role of psychiatrists in the delivery of palliative care in persons with psychiatric disorders, including advance care planning, symptom management, patient-physician relationship, and collaborative care.*
- 7 Patient-Targeted Googling and Psychiatry: A Brief Review and Recommendations in Practice**  
Alexander Cole, M.D.  
*Guidelines include obtaining informed consent and documenting and disclosing discovered information.*
- 10 The Psychiatric Ramifications of Moral Injury Among Veterans**  
Thayanne Delima-Tokarz, D.O.  
*Analyzing the concept of moral injury, with discussion of PTSD, psychiatric ramifications, screening tools, and possible treatment.*
- 13 A Need for Improved Detection of Child and Adolescent Sexual Abuse**  
Fatima Masumova, D.O.  
*Discussion of signs and symptoms, screening, interview techniques, and reporting.*
- 16 Late-Victorian Psychiatry as Depicted in Stonehearth Asylum**  
Awais Aftab, M.D.  
*Synopsis of early 19th-century asylums as depicted in the film.*
- 18 Look for These Events at the Annual Meeting in Atlanta!**
- 19 Residents' Resources**
- 20 Author Information and Upcoming Themes**

## PSYCHIATRY ETHICS

**Editor-in-Chief**  
Rajiv Radhakrishnan, M.B.B.S., M.D.

**Senior Deputy Editor**  
Katherine Pier, M.D.

**Deputy Editor**  
Hun Millard, M.D., M.A.

**Guest Editor**  
Jennifer Huang Harris, M.D.

**Associate Editors**  
Rafik Sidaros, M.B.B.Ch.  
Janet Charoensook, M.D.

**Staff Editor**  
Angela Moore

**Editors Emeriti**  
Sarah B. Johnson, M.D.  
Molly McVoy, M.D.  
Joseph M. Ceriméle, M.D.  
Sarah M. Fayad, M.D.  
Monifa Seawell, M.D.  
Arshya Vahabzadeh, M.D.  
Misty Richards, M.D., M.S.

**Editor-in-Chief**  
Rajiv Radhakrishnan, M.B.B.S., M.D.

**Senior Deputy Editor**  
Katherine Pier, M.D.

**Deputy Editor**  
Hun Millard, M.D., M.A.

**Associate Editors**  
Rafik Sidaros, M.B.B.Ch.  
Janet Charoensook, M.D.

*The Residents' Journal*, the largest and most robust resident-led journal in the house of medicine, is an e-publication that serves as a forum to share your ideas and experiences in training, clinical practice, research, and careers with your colleagues.

To submit a manuscript, please visit [mc.manuscriptcentral.com/appi-ajp](http://mc.manuscriptcentral.com/appi-ajp) and select a manuscript type for AJP Residents' Journal. You may submit a commentary (500 words), book review (500 words), history of psychiatry (500 words), clinical case conference (1,250 words), review article (1,500 words), treatment in psychiatry article (1,500 words), research article (1,250 words), drug review (1,500 words), or letter to the editor (250 words).

*The Residents' Journal* is sent free-of-charge to all psychiatry residents. Anyone interested in being included on the distribution list should contact Angela Moore, *The Residents' Journal* staff editor at [ajp@psych.org](mailto:ajp@psych.org) with "Subscribe to Residents' Journal" in the subject line.

To access the complete Residents' Journal archives, visit [ajp.psychiatryonline.org/residents\\_journal](http://ajp.psychiatryonline.org/residents_journal)

# Go Online

Visit [ajp.psychiatryonline.org](http://ajp.psychiatryonline.org) for these features!

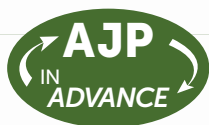

## AJP in Advance

*Discover the latest research advances before they appear in print*

### **Fluidity of the Subsyndromal Phenomenology of Borderline Personality Disorder Over 16 Years of Prospective Follow-Up**

The symptoms of borderline personality disorder are quite fluid, with remissions and recurrences being common. However, the more clinically urgent acute symptoms of the disorder (e.g., self-mutilation) seem to have a better prognosis than the less turbulent temperamental symptoms (e.g., chronic anger).

### **Neural Correlates of Irritability in Disruptive Mood Dysregulation and Bipolar Disorders**

Youths who labeled facial emotions demonstrated that irritability correlates with amygdala activity across all intensities of all emotions in disruptive mood dysregulation disorder but only fearful faces in bipolar disorder. Thus, the transdiagnostic presence of irritability may not call for a common treatment approach.

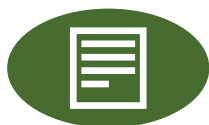

## AJP CME

*Earn CME credit: 3 courses per issue*

This month's courses appear on pages 647–650. Each short course is based on one article in this issue and can earn up to 1 *AMA PRA Category 1 Credit™*. CME credit is issued only **online**, and a paid subscription to AJP's CME course program is required.

Visit [psychiatryonline.org/cme](http://psychiatryonline.org/cme) and click on the "American Journal of Psychiatry" tab.

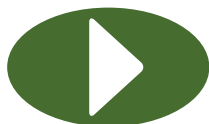

## AJP Multimedia

*Access Audio or Video for highlights of each issue*

In AJP Audio this month, Executive Editor Michael Roy discusses nutrient-based treatments as adjuncts to antidepressants, the prevalence and characteristics of cannabis use disorder as defined in DSM-5, long-term mortality rates in women with severe postpartum psychiatric disorders, a program for children in foster care and their biological parents designed to prevent repetition of childhood maltreatment, whether the relationship between preschool poverty and school-age depression is mediated by functional brain connectivity, and the NIMH Research Domain Criteria project.

In this month's video, Deputy Editor Daniel S. Pine, M.D., discusses correlations between mortality and types of medications in schizophrenia, and the relationship between telomere length and anxiety and depression.

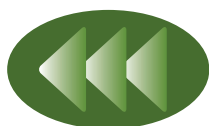

## History of Psychiatry

*Revisit the field's rich history through the pages of AJP*

### **50 years ago this month: "Psychiatric Problems of Overdeveloped Countries"**

Dr. George M. Carstairs describes the early stages of Western psychiatry in India and, in considering the paths Indian psychiatry might take in the coming years, looks to the examples of the United States and Britain. Many of the problems he identifies there remain quite familiar today.

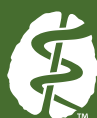

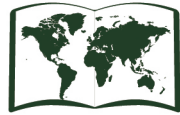

# SHARP

Shanghai Archives of Psychiatry · Since 1959

上 海 精 神 医 学

WWW.SHANGHAIARCHIVESOFPSYCHIATRY.ORG

DECEMBER 2015 • VOL. 27 • NO. 6

## IN THIS ISSUE

<http://dx.doi.org/10.11919/j.issn.1002-0829.216028>

### SYSTEMATIC REVIEW AND META-ANALYSIS

**Metformin for treatment of clozapine-induced weight gain in adult patients with schizophrenia: a meta-analysis**

Zhengrong LIU, Wei ZHENG, Shuai GAO, Zhisong QIN, Guannan LI, Yuping NING

<http://dx.doi.org/10.11919/j.issn.1002-0829.215071>

### ORIGINAL RESEARCH ARTICLES

**Comparison of the density of gamma-aminobutyric acid in the ventromedial prefrontal cortex of patients with first-episode psychosis and healthy controls**

Zhilei YANG, Yajing ZHU, Zhenhua SONG, Li MEI, Jianye ZHANG, Tianyi CHEN, Yingchan WANG, Yifeng XU, Kaida JIANG, Yao LI, Dengtang LIU

<http://dx.doi.org/10.11919/j.issn.1002-0829.215130>

**Association of schizophrenia with the rs821633 polymorphism in the DISC1 gene among Han Chinese**

Guoqin HU, Chengqing YANG, Jing ZHAO, Minghuan ZHU, Xiangqing GUO, Chenxi BAO, Si JIA, Ahong XU, Yong JIE, Zuowei WANG, Chen ZHANG, Yongguang HE, Qinyu LV, Shunying YU, Zhenghui YI

<http://dx.doi.org/10.11919/j.issn.1002-0829.215120>

**Comorbid anxiety and depression in school-aged children with attention deficit hyperactivity disorder (ADHD) and self-reported symptoms of ADHD, anxiety, and depression among parents of school-aged children with and without ADHD**

Weiping XIA, Lixiao SHEN, Jinsong ZHANG

<http://dx.doi.org/10.11919/j.issn.1002-0829.215115>

## FORUM

**Psychopharmacological treatment for schizophrenia: less is more**

Chuanyue WANG

<http://dx.doi.org/10.11919/j.issn.1002-0829.215086>

**'Less is more' in the Chinese context**

Yifeng XU

<http://dx.doi.org/10.11919/j.issn.1002-0829.215106>

## CASE REPORT

**Case report of eosinophilia induced by quetiapine**

Liming CHEN, Pei TAN, Xiaolin TAN

<http://dx.doi.org/10.11919/j.issn.1002-0829.215005>

**Panic attacks 10 years after heart transplantation successfully treated with low-dose citalopram: a case report**

Chenyu YE, Yamin ZHUANG, Jianlin JI, Hao CHEN

<http://dx.doi.org/10.11919/j.issn.1002-0829.215021>

## BIostatistics in Psychiatry (30)

**The debate about p-values**

Ying LU, Ilana BELITSKAYA-LEVY

<http://dx.doi.org/10.11919/j.issn.1002-0829.216027>

## CORRESPONDENCE

**Comorbid bipolar disorder and obsessive-compulsive disorder: state of the art in pediatric patients**

Matteo TONNA, Andrea AMERIO, Anna Odone, Brendon STUBBS, S. Nassir GHAEMI

<http://dx.doi.org/10.11919/j.issn.1002-0829.215128>
