## PERSPECTIVAS

### EDITORIALES

- 551 La epidemiología de los trastornos por consumo de cannabis del DSM-5 en adultos norteamericanos: Ciencia para informar a los clínicos que trabajan en un paisaje social cambiante**

*Wilson M. Compton, M.D., M.P.E., Ruben Baler, Ph.D.*

- 554 Mortalidad temprana en las personas con esquizofrenia**

*Delbert G. Robinson, M.D.*

- 556 Desgaste de los telómeros: Una ventana a los trastornos mentales comunes y el envejecimiento celular**

*Charles F. Reynolds III, M.D.*

- 559 Los trastornos psiquiátricos con primera aparición en el postparto presagian un alto riesgo de mortalidad por causa no natural en el primer año**

*Eydie L. Moses-Kolko, M.D., Alison E. Hipwell, Ph.D., Clin.Psy.D.*

### COMENTARIOS

- 562 La controversia de los RDoC (Criterios de los Dominios de Investigación): ¿Paradigma alternativo o paradigma dominante?**

*William T. Carpenter, Jr., M.D.* **AUDIO**

- 564 Opioides en los trastornos psiquiátricos: ¿Regreso al futuro?**

*Alan F. Schatzberg, M.D.*

### TRATAMIENTO EN PSIQUIATRÍA

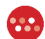

- 566 Intervención psiquiátrica de dos generaciones en la prevención de la reincidencia temprana del maltrato infantil**

*John Nicholas Constantino, M.D., et al.* **AUDIO • CLINICAL GUIDANCE**

### IMÁGENES EN PSIQUIATRÍA

- 574 Un pionero científico de la psiquiatría**

*Jeffrey A. Lieberman, M.D., Robert Michels, M.D.*

### RESÚMENES Y RESEÑAS

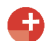

- 575 Nutracéuticos adyuvantes para la depresión: Una revisión sistemática y meta-análisis**

*Jerome Sarris, Ph.D., M.H.Sc., et al.* **CME • AUDIO • CLINICAL GUIDANCE**

## NUEVAS INVESTIGACIONES

### ARTÍCULOS

- 588 Prevalencia y correlatos del trastorno por consumo de cannabis del DSM-5, 2012-2013: Hallazgos de la Encuesta Epidemiológica Nacional sobre Alcohol y Enfermedades Relacionadas-III**

*Deborah S. Hasin, Ph.D., et al.* **EDITORIAL • CME • AUDIO**

- 600 Mortalidad y exposición acumulativa a antipsicóticos, antidepresivos y benzodiazepinas en pacientes con esquizofrenia: Un estudio observacional de seguimiento**

*Jari Tiihonen, M.D., Ph.D., et al.* **EDITORIAL • VIDEO**

- 607 Envejecimiento cerebral acelerado en esquizofrenia: Un estudio longitudinal de reconocimiento de patrones**

*Hugo G. Schnack, Ph.D., et al.*

- 617 Los trastornos depresivo y de ansiedad muestran una asociación longitudinal de 6 años sólida, pero no dinámica, con la corta longitud de los telómeros de leucocitos**

*Josine E. Verhoeven, M.Sc., et al.* **EDITORIAL • VIDEO**

**625 Efecto de la conectividad del hipocampo y de la amígdala en la relación entre la pobreza pre-escolar y la depresión en edad escolar**

Deanna Barch, Ph.D., et al. CME • AUDIO

**635 Mortalidad por todas las causas en mujeres con trastornos psiquiátricos postparto severos**

Benedicte Marie Winther Johannsen, B.Sc., et al. EDITORIAL • AUDIO

**COMUNICADOS Y ACTUALIZACIONES**

**CARTAS AL EDITOR**

**643 Dosificación del G-CSF para prevenir agranulocitosis recurrente inducida por clozapina**

G. Mark Freeman, Jr., M.D., Ph.D., et al.

**RESEÑAS BIBLIOGRÁFICAS**

**644 [Clinical Manual of Emergency Psychiatry, Second Editio]**

Scott A. Simpson, M.D., M.P.H.

**645 [Handbook of Assessment and Treatment of Eating Disorders]**

Patricia Westmoreland, M.D., and Philip S. Mehler, M.D., F.A.C.P.

**646 [Books Received]**

**OTROS TEMAS DE INTERÉS**

**647 Educación Médica Continuada**

**Cubierta:** [With public attitudes about marijuana changing and DSM-5 modifying the criteria for cannabis use disorder by dropping the requirement for legal problems and adding craving, withdrawal, and a severity metric, a need arose for new data on the prevalence of marijuana use and abuse. Hasin and colleagues (p. 588) provide such data for 2012 and 2013. The findings suggest that marijuana use is common and frequently associated with impairment. Image from Shutterstock.com; © Atomazul.]

Article content that addresses **Core Competencies**, defined by the Accreditation Council of Graduate Medical Education and the American Board of Medical Specialties, is indicated by the following symbols:

- |                                                                                                                            |                                                                                                                             |
|----------------------------------------------------------------------------------------------------------------------------|-----------------------------------------------------------------------------------------------------------------------------|
|  Professionalism                        |  Patient Care and Procedural Skills      |
|  Medical Knowledge                      |  Practice-Based Learning and Improvement |
|  Interpersonal and Communication Skills |  Systems-Based Practice.                 |

More information is available at [www.abms.org/maintenance\\_of\\_certification/MOC\\_competencies.aspx](http://www.abms.org/maintenance_of_certification/MOC_competencies.aspx)

**AUDIO** Highlighted in AJP Audio, a downloadable .mp3 file available at [ajp.psychiatryonline.org](http://ajp.psychiatryonline.org)

**CME** A course covering the content of this article is available online for paid subscribers to the AJP CME Course program

**EDITORIAL** Discussed in one of the issue's editorials

**GUÍAS CLÍNICAS** Clinical Guidance provided on the English table of contents

**VIDEO** Highlighted online by Deputy Editor Daniel S. Pine, M.D.

**La Tabla de Contenidos y resúmenes de Este Número Está Disponible en Español**

(This issue's Table of Contents and abstracts are available in Spanish)

Translation presented in collaboration with the Office of Global Health, Rutgers-Robert Wood Johnson Medical School

Support for this effort provided by ACTA Colombia.

**Translation courtesy of**

**Sergi Casals, M.A.**, Garuna, Medellín, Colombia ([www.garunaeditors.com](http://www.garunaeditors.com))

**Carlos Lopez Jaramillo, M.D.**, Universidad de Antioquia, Medellín, Colombia

**Javier I. Escobar, M.D., M.Sc.**, Rutgers-Robert Wood Johnson Medical School

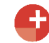

## Nutracéuticos adyuvantes para la depresión: Una revisión sistemática y meta-análisis

Jerome Sarris, Ph.D., M.H.Sc., Jenifer Murphy, Ph.D., David Mischoulon, M.D., Ph.D., George I. Papakostas, M.D., Maurizio Fava, M.D., Michael Berk, M.D., Ph.D., Chee H. Ng, M.D.

**Objetivo:** Hay un creciente interés en aumentar las estrategias para mejorar la respuesta inadecuada a los antidepresivos. El uso adyuvante de nutrientes estandarizados de nivel farmacéutico, conocidos como nutracéuticos, tiene el potencial de modular varias vías neuroquímicas implicadas en la depresión. Si bien se han realizado muchos estudios en esta área, hasta la fecha no se ha hecho ninguna revisión sistemática (o meta-análisis).

**Método:** Se llevó a cabo una búsqueda sistemática en PubMed, CINAHL, *Cochrane Library* y *Web of Science* hasta diciembre 2015, de ensayos clínicos que utilizaran nutrientes adyuvantes para la depresión. Cuando se contó con suficientes datos, se utilizó un modelo de efectos aleatorios para analizar la diferencia de medias estándar entre el tratamiento y el placebo en el cambio entre la línea de base y el punto final, combinando los datos de tamaño de efecto. También se realizaron el gráfico de embudo y análisis de heterogeneidad.

**Resultados:** Se encontraron resultados primarios positivos para estudios replicados que evaluaban la S-adenosil metio-

nina (SAME), el metilfolato, el omega-3 (principalmente EPA o etil-EPA) y la vitamina D, con estudios aislados positivos para la creatina, el ácido fólico y una combinación de aminoácidos. Se encontraron resultados mixtos para el zinc, el ácido fólico, la vitamina C y el triptófano, con resultados no significativos para el inositol. No se observaron efectos adversos importantes en los estudios (aparte de alteraciones digestivas menores). Un meta-análisis de omega 3 adyuvante versus placebo reveló un efecto significativo, entre moderado y fuerte, a favor del omega-3. En contraste, un meta-análisis del ácido fólico no reveló ninguna diferencia significativa con el placebo. Se encontró una marcada heterogeneidad entre estudios en un test de Higgings para los estudios de ácidos omega-3 y fólico; los gráficos de embudo también revelaron asimetría (reflejando posibles sesgos de los estudios).

**Conclusiones:** La evidencia actual apoya el uso adyuvante de SAME, metilfolato, omega-3 y vitamina D con antidepresivos para reducir los síntomas depresivos.

(*Am J Psychiatry* 2016; 173:575–587)

# Prevalencia y correlatos del trastorno por consumo de cannabis del DSM-5, 2012-2013: Hallazgos de la Encuesta Epidemiológica Nacional sobre Alcohol y Enfermedades Relacionadas-III

Deborah S. Hasin, Ph.D., Bradley T. Kerridge, Ph.D., Tulshi D. Saha, Ph.D., Boji Huang, M.D., Ph.D., Roger Pickering, M.S., Sharon M. Smith, Ph.D., Jeessun Jung, Ph.D., Haitao Zhang, Ph.D., Bridget F. Grant, Ph.D., Ph.D.

**Objetivo:** Las actitudes hacia la marihuana están cambiando, la prevalencia del trastorno por consumo de cannabis según el DSM-IV ha aumentado y el DSM-5 ha modificado los criterios del trastorno por consumo de cannabis. Por consiguiente, es necesaria información actualizada sobre la prevalencia, las características demográficas, la comorbilidad psiquiátrica, la incapacidad y el tratamiento del trastorno por consumo de cannabis tal como está definido en el DSM-5.

**Método:** En 2012-2013, se entrevistaron a 36.309 participantes de  $\geq 18$  años en la encuesta nacional estadounidense sobre alcohol y enfermedades relacionadas-III. Se evaluaron los trastornos psiquiátricos y de consumo de sustancias con la herramienta *Alcohol Use Disorders and Associated Disabilities Interview Schedule-5*.

**Resultados:** Las prevalencias de 12 meses y de por vida del trastorno por consumo de cannabis fueron 2,5% y 6,3%. Entre aquellos con diagnósticos de 12 meses y de por vida, la media de días de consumo de marihuana al año fue 225,3 (SE=5,7) y 274,2 (SE=3,8). Las posibilidades de trastorno por consumo de cannabis de 12 meses y de por vida fueron más altas para hombres nativos americanos no casados, con ba-

jos ingresos y adultos jóvenes (por ejemplo, para aquellos entre 18-24 años versus  $\geq 45$ : *odds ratio* para el trastorno de 12 meses=7,2; intervalo de confianza del 95%=5,5-9,5). El trastorno por consumo de cannabis se asoció con otros trastornos por consumo de sustancias, trastornos afectivos, trastornos de ansiedad y de personalidad. El trastorno por consumo de cannabis de 12 meses se asoció con incapacidad. A medida que aumentaba la severidad del trastorno, prácticamente todas las asociaciones se volvían más fuertes. Solamente el 13,2% de individuos con trastorno por consumo de cannabis de por vida participaron en programas de 12 pasos o tratamiento profesional.

**Conclusiones:** El trastorno por consumo de cannabis del DSM-5 es prevalente, está asociado con comorbilidad e incapacidad, y en la mayoría de los casos no es tratado. Los hallazgos sugieren la necesidad de mejorar la prevención y de educar al público, los profesionales y los encargados de diseñar políticas, sobre los posibles daños asociados con los trastornos por consumo de cannabis y las intervenciones existentes.

(*Am J Psychiatry* 2016; 173:588-599)

# Mortalidad y exposición acumulativa a antipsicóticos, antidepresivos y benzodiazepinas en pacientes con esquizofrenia: Un estudio observacional de seguimiento

Jari Tiihonen, M.D., Ph.D., Ellenor Mittendorfer-Rutz, Ph.D., Minna Torniainen, Ph.D., Kristina Alexanderson, Ph.D., Antti Tanskanen, Ph.Lic.

**Objetivo:** A pesar de que en los últimos años se ha prestado mucha atención a la mortalidad relacionada con los medicamentos psicotrópicos, poco se sabe acerca de la relación entre el riesgo de muerte y la carga antipsicótica acumulativa, y menos aún acerca de la relación entre la mortalidad y la exposición acumulativa a los antidepresivos o las benzodiazepinas. Los autores examinaron estas relaciones utilizando bases de datos de ámbito nacional en Suecia.

**Método:** Los autores utilizaron bases de datos recolectadas de manera prospectiva en todo el país para identificar a todos los individuos entre 16 y 65 años con un diagnóstico de esquizofrenia (N=21.492) en Suecia. Se calcularon las tasas de mortalidad por todas las causas y por causas específicas como una función de la exposición baja, moderada y alta a antipsicóticos, antidepresivos y benzodiazepinas desde 2006 hasta 2010.

**Resultados:** En comparación con la falta de exposición, tanto la exposición moderada (cociente de riesgo ajustado=0,59; IC 95%=0,49-0,70) como la exposición alta (cociente de riesgo ajustado=0,75; IC 95%=0,63-0,89) a antipsicóticos estu-

vieron asociadas con mortalidad general substancialmente inferior. La exposición moderada a antidepresivos se asoció con una mortalidad inferior (cociente de riesgo ajustado=0,85; IC 95%=0,73-0,98), y la exposición alta, con una mortalidad aún más baja (cociente de riesgo ajustado=0,71; IC 95%=0,59-0,86). La exposición a benzodiazepinas mostró una relación dosis-respuesta con la mortalidad (cocientes de riesgo hasta 1,74; IC 95%=1,50-2,03).

**Conclusiones:** El uso moderado y de dosis altas de antipsicóticos y antidepresivos estuvo asociado con una disminución de la mortalidad general entre el 15% y el 40%, mientras que el uso crónico de dosis altas de benzodiazepinas estuvo asociado con un riesgo de muerte hasta un 70% más alto comparado con la no exposición. Dado que los pacientes con ansiedad y síntomas depresivos pueden tener un riesgo de muerte intrínseco más alto, el hallazgo para las benzodiazepinas puede ser atribuible hasta cierto punto a la confusión residual.

(*Am J Psychiatry* 2016; 173:600-606)

## Envejecimiento cerebral acelerado en esquizofrenia: Un estudio longitudinal de reconocimiento de patrones

Hugo G. Schnack, Ph.D., Neeltje E.M. van Haren, Ph.D., Mireille Nieuwenhuis, M.S., Hilleke E. Hulshoff Pol, Ph.D., Wiepke Cahn, M.D., Ph.D., René S. Kahn, M.D., Ph.D.

**Objetivo:** A pesar de la cantidad de estudios longitudinales de neuroimágenes que se han publicado, sigue existiendo una pregunta básica sin responder sobre la pérdida cerebral en la esquizofrenia: ¿Refleja ésta el envejecimiento acelerado del cerebro o está causada por un proceso fundamentalmente diferente? Los autores utilizaron regresión de vectores de soporte, una técnica de aprendizaje automático supervisado, para abordar esta pregunta.

**Método:** En una muestra longitudinal de 341 pacientes con esquizofrenia y 386 sujetos sanos con uno o más exámenes de IRM (1.197 en total), se utilizaron algoritmos de aprendizaje automático para construir modelos que permitieran predecir la edad del cerebro y la presencia de esquizofrenia («puntuación de esquizofrenia»), con base en los mapas de densidad de sustancia gris. La edad en la línea basal oscilaba entre 16 y 67 años, y los exámenes de seguimiento se obtuvieron entre 1 y 13 años después de la escanografía inicial. Se calcularon las diferencias entre la edad cerebral y la edad cronológica («vacío en edad cerebral») y entre la puntuación de esquizofrenia y la puntuación sana de referencia («vacío de esquizofrenia»). Se calculó el envejecimiento cerebral acelerado a partir de los cambios en el vacío de edad cerebral entre dos mediciones consecutivas. El modelo de predicción de la edad se validó en una muestra independiente.

**Resultados:** En los pacientes con esquizofrenia, la edad cerebral era significativamente superior que la edad cronológica al comienzo del estudio (+3,36 años) e incrementó progresivamente durante el seguimiento (+1,24 años adicionales al vacío de la evaluación inicial). La aceleración del envejecimiento cerebral no fue constante: disminuyó de 2,5 años/año justo después del inicio de la enfermedad hasta aproximadamente el ritmo normal (1 año/año) aproximadamente 5 años después del inicio de la enfermedad. El envejecimiento diferencial de la esquizofrenia («vacío de esquizofrenia») también aumentó durante el seguimiento, pero la variabilidad más pronunciada en las anomalías cerebrales durante el seguimiento hace que este aumento no sea significativo.

**Conclusiones:** La pérdida cerebral progresiva en esquizofrenia parece reflejar dos procesos distintos: uno relativamente homogéneo, que refleja el envejecimiento acelerado del cerebro y está relacionado con varias medidas de resultado, y uno más variable, que posiblemente refleja variación individual y el uso de medicación. Diferenciar estos dos procesos puede no sólo dilucidar los diferentes factores que influyen en la pérdida cerebral, sino también ayudar a individualizar los tratamientos.

(*Am J Psychiatry* 2016; 173:607–616)

# Los trastornos depresivo y de ansiedad muestran una asociación longitudinal de 6 años sólida, pero no dinámica, con la corta longitud de los telómeros de leucocitos

Josine E. Verhoeven, M.Sc. Patricia van Oppen, Ph.D. Dóra Révész, M.Sc., Owen M. Wolkowitz, M.D.,  
Brenda W.J.H. Penninx, Ph.D.

**Objetivo:** Varios estudios transversales han relacionado los trastornos depresivo y de ansiedad con la corta longitud de los telómeros de leucocitos (LTL) como indicador de envejecimiento celular. Sin embargo, dichos estudios han dejado muchas preguntas sin resolver acerca de la causalidad subyacente y el orden de las asociaciones. El objetivo de este largo estudio longitudinal fue examinar la relación entre los trastornos depresivo y de ansiedad y la LTL en un período de tiempo de 6 años.

**Método:** Los datos son del Estudio Holandés de Depresión y Ansiedad, que incluye 2.292 pacientes con diagnósticos de trastorno depresivo o de ansiedad en remisión o presentes en la actualidad y 644 sujetos sanos de control. La LTL se evaluó utilizando PCR cuantitativa y se midió en la línea basal y después de 6 años; los diagnósticos de trastorno depresivo y de ansiedad y sus características (curso, duración y severidad) se determinaron al comienzo del estudio y después de 2, 4 y 6 años.

**Resultados:** Los resultados mostraron que las personas con

trastorno depresivo o de ansiedad presente o en remisión ( $B = -52,6$ ) o actual ( $B = -60,8$ ) tuvieron consistentemente una LTL más corta en comparación con los sujetos sanos de control en la línea de base y en el seguimiento a los 6 años, siendo esta diferencia significativa cuando se controlaba el estilo de vida y las variables de salud somática. Sin embargo, los cambios en el curso de las características del trastorno depresivo o de ansiedad no se asociaron con tasas distintas de desgaste de la LTL.

**Conclusiones:** Este estudio confirmó las fuertes asociaciones de los trastornos depresivo y de ansiedad con telómeros más cortos, pero es interesante que no demostró que los trastornos depresivo y de ansiedad y la LTL cambien a la par con el transcurso del tiempo, lo que sugiere la ausencia de una relación directa en cada persona. Se sugiere que la LTL corta puede ser una consecuencia a largo plazo o un factor de vulnerabilidad subyacente para los trastornos depresivo o de ansiedad.

(*Am J Psychiatry* 2016; 173:617–624)

## Efecto de la conectividad del hipocampo y de la amígdala en la relación entre la pobreza pre-escolar y la depresión en edad escolar

Deanna Barch, Ph.D., David Pagliaccio, Ph.D., Andy Belden, Ph.D., Michael P. Harms, Ph.D., Michael Gaffrey, Chad M. Sylvester, M.D., Ph.D., Rebecca Tillman, M.S., Joan Luby, M.D.

**Objetivo:** En este estudio, los autores examinaron la hipótesis de que la pobreza que se experimenta en la infancia temprana, medida por la proporción ingresos-necesidades, tiene un impacto en la conectividad funcional del cerebro en la edad escolar, que a su vez media influencias sobre el estado ánimo negativo/la depresión del niño.

**Método:** Los participantes eran de un estudio prospectivo longitudinal de desarrollo de las emociones. Con niños en edad pre-escolar, de 3 a 5 años, primero se verificó que estuvieran registrados en centros de atención primaria y en guarderías en el área de St. Louis y posteriormente se les hicieron evaluaciones comportamentales anuales durante hasta 12 años. De los niños en edad pre-escolar sanos y con un historial de síntomas de depresión, se tomaron neuroimágenes en edad escolar. Utilizando IRM funcional, los autores examinaron la conectividad funcional en estado de reposo de todo el cerebro con la amígdala y el hipocampo derechos e izquierdos.

**Resultados:** La relación bajos ingresos-necesidades en la edad pre-escolar se asoció con conectividad reducida entre el hipocampo y la amígdala y en la edad escolar, varias regiones, incluyendo la corteza frontal superior, el giro lingual, el cíngulo posterior y el putamen. La relación bajos ingresos-necesidades predijo mayor severidad de estado de ánimo negativo/depresión en edad escolar, igual que la conectividad entre el hipocampo izquierdo y la corteza frontal superior derecha y entre la amígdala derecha y el giro lingual derecho. La conectividad medió la relación entre el ratio bajos ingresos-necesidades y estado de ánimo/negativo/depresión en el momento de la escanografía.

**Conclusiones:** Estos hallazgos sugieren que la pobreza en la infancia temprana, evaluada por una medición como mínimo, puede influir en el desarrollo de la conectividad del hipocampo y de la amígdala de una manera que lleve a síntomas de estado de ánimo negativo durante la infancia posterior.

*(Am J Psychiatry 2016; 173:625–634)*



## Mortalidad por todas las causas en mujeres con trastornos psiquiátricos postparto severos

Benedicte Marie Winther Johannsen, B.Sc., Janne Tidselbak Larsen, M.Sc., Thomas Munk Laursen, Ph.D., Veerle Bergink, Ph.D., Samantha Meltzer-Brody, M.D., M.P.H., Trine Munk-Olsen, Ph.D.

**Objetivo:** El período de postparto está asociado con un alto riesgo de episodios psiquiátricos. Los autores estudiaron la mortalidad en mujeres con la primera aparición de trastornos psiquiátricos severos después del parto y compararon sus tasas de mortalidad con las de mujeres de la población de su entorno, incluyendo otras pacientes psiquiátricas (madres y mujeres sin hijos).

**Método:** En un estudio de cohorte basado en registros, con información complementaria de registros de población daneses, los autores identificaron mujeres con primeros contactos psiquiátricos como internas o como pacientes ambulatorias, entre 0 y 3 meses en el post parto. La principal medida de resultado fueron los índices de tasas de mortalidad (MRRs, por sus siglas en inglés): muertes por causas naturales (enfermedades) o no naturales (suicidios, accidentes y homicidios). La cohorte incluyó 1.545.857 mujeres, que representaban 68.473.423 de años-persona en riesgo.

**Resultados:** En total, 2.699 mujeres tuvieron la primera aparición de trastornos psiquiátricos en los 0-3 meses de postparto, y 96 de ellas murieron durante el seguimiento. Las

mujeres con trastornos psiquiátricos postparto tuvieron una MRR más alta (3,74; IC 95%=3,06–4,57) que las madres que no tuvieron un inicio de trastorno en el postparto (MRR=2,73; IC 95%=2,67–2,79) cuando se las comparó con las madres sin historial psiquiátrico. Sin embargo, las mujeres sin hijos con diagnósticos psiquiátricos tuvieron la MRR más alta (6,15; IC 95%=5,94–6,38). Las causas no naturales de muerte representaron el 40,6% de las fatalidades en las mujeres con trastornos psiquiátricos postparto, y en el primer año después del diagnóstico, el riesgo de suicidio se vio dramáticamente incrementado (MRR=289,42; IC 95%=144,02–581,62) al compararlas con las madres sin historial psiquiátrico.

**Conclusiones:** Las mujeres con trastornos psiquiátricos postparto severos tuvieron MRRs elevadas en comparación con las madres sin diagnósticos psiquiátricos, y el primer año después del diagnóstico representa una época de riesgo relativo de suicidio particularmente alto en este grupo vulnerable.

(*Am J Psychiatry* 2016; 173:635–642)
